# Supplementary material for: Decreased levels of regulatory B cells in patients with acute pancreatitis: association with the severity of the disease
Source: PubMed Central journal article supplement (PMC6281415; doi:10.18632/oncotarget.23911), 2018-01-03
Supplement: oncotarget-09-36067-s001.pdf [file oncotarget-09-36067-s001.pdf]

# Decreased levels of regulatory B cells in patients with acute pancreatitis: association with the severity of the disease

## SUPPLEMENTARY MATERIALS

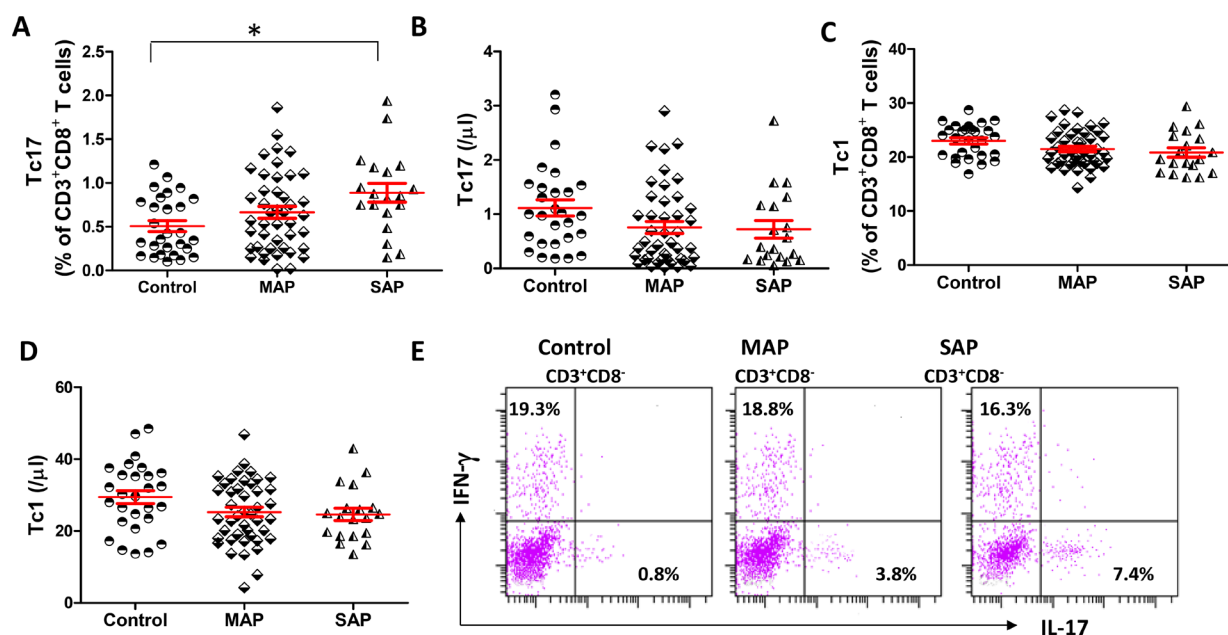

**Supplementary Figure 1: Tc17 cells increased in patients with AP.** Graphs show cumulative data on the frequencies and numbers of Tc17 cells (A, B) and Tc1 cells (C, D) from healthy individuals ( $n = 21$ ), MAP patients ( $n = 46$ ) and SAP patients ( $n = 17$ ). (E) Representative dot plots of Tc1 and Tc17 cells from one healthy individual, one MAP patient and one SAP patient are shown.  $*P < 0.05$ .

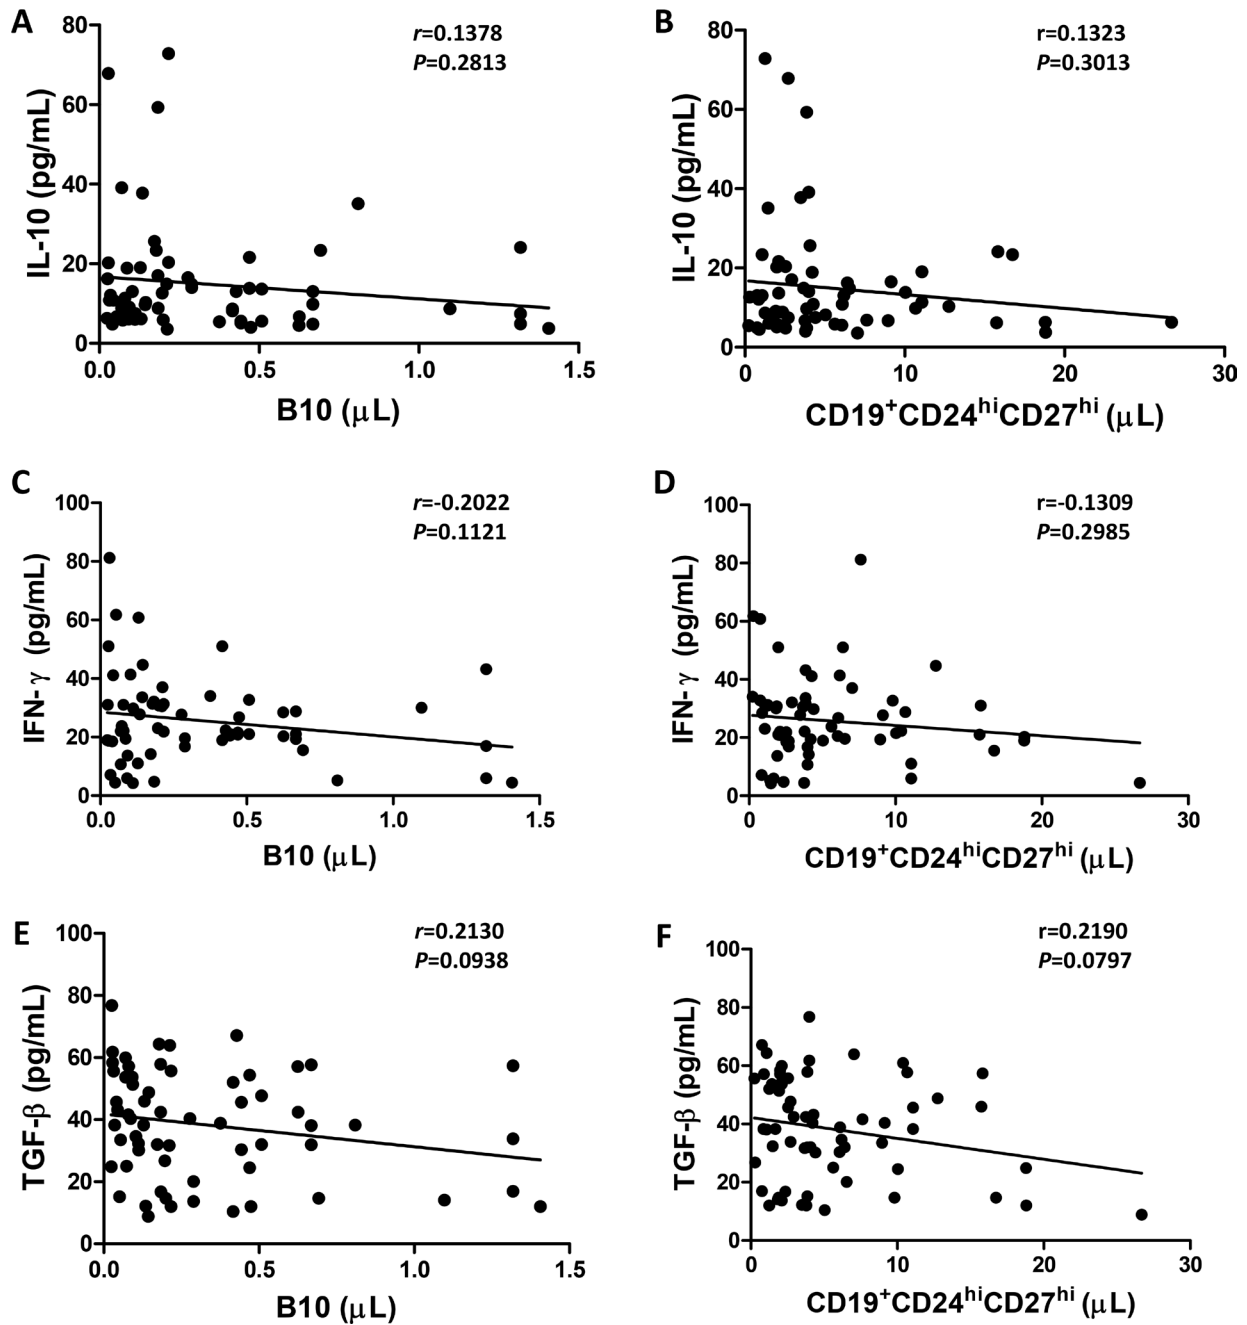

**Supplementary Figure 2: The correlation between B10 or CD19+CD24<sup>hi</sup>CD27<sup>hi</sup> cells and serum levels of cytokines in patients with AP.** Spearman's rank correlation test was performed to compare the respective correlations between B10 or CD19+CD24<sup>hi</sup>CD27<sup>hi</sup> and IL-10 (A, B), IFN- $\gamma$  (C, D) and TGF- $\beta$  (E, F) in patients with AP.
